# Supplementary material
Source: Research Square preprint supplement (doi:10.21203/rs.3.rs-9384591/v1)
Supplement: Supplementary file 1 [file e7a9b5769c338d165948a049.docx]

**GRIPP2 Short Form – Completed Checklist**

**Study title:** Rethinking the role of participatory video for school mental health interventions: insights from a feasibility study in Indian secondary schools

| **GRIPP2 item** | **Description of Patient and Public Involvement (PPI) in this study** |
| --- | --- |
| **1. Aim of PPI** | The aim of involving young people was to foreground adolescent perspectives in school mental health research, assess the feasibility and usefulness of Participatory Video (PV), and examine whether PV directly benefits adolescents by supporting meaningful, equitable participation. PV was intended to generate youth‑centred insights to supplement standard intervention evaluation and potentially function as an intervention mechanism itself. |
| **2. Methods used for PPI** | Adolescents (aged 12–16) participated as co‑creators of knowledge through Participatory Video. Following a train‑the‑trainer model, students received filmmaking workshops and collaboratively developed, filmed, and screened short films about school wellbeing and their experience of the SAMA programme. Young people had control over content, participation on camera, consent for screening, and final outputs, supported by researchers and lay counsellors. |
| **3. PPI results (outcomes and impact)** | PPI resulted in four adolescent‑led films that revealed perspectives on mental health and the intervention not captured by other evaluation methods. Direct benefits for young people included skills development, confidence, self‑expression, enhanced self‑awareness, peer connection, and pride. PV supported adolescents’ engagement with and psychological ownership of the intervention and increased awareness among peers, teachers, and stakeholders |
| **4. Influence on the study** | Insights from the films influenced researchers’ understanding of how adolescents experienced school mental health and which intervention components mattered most (e.g. the central role of lay counsellors and the Speak Out box). PV helped identify mismatches between adult and youth interpretations of the programme, informed ongoing intervention refinement, and shaped interpretation of feasibility and process evaluation findings. |
| **5. Reflections / critical perspective** | The study critically reflected on power hierarchies between adults and young people, limits to inclusivity, and uncertainties about PV’s political or advocacy role in schools. The authors acknowledge that PV does not automatically dismantle power structures and may reproduce dominant discourses. Ongoing reflexivity and attention to context were identified as essential for ethical and meaningful PPI. |
